# Supplementary material for: NOD2, RIP2 and IRF5 Play a Critical Role in the Type I Interferon Response to Mycobacterium tuberculosis
Source: PubMed Central journal article supplement (PMC2698121; doi:10.1371/journal.ppat.1000500), 2009-07-03

Fig. S2

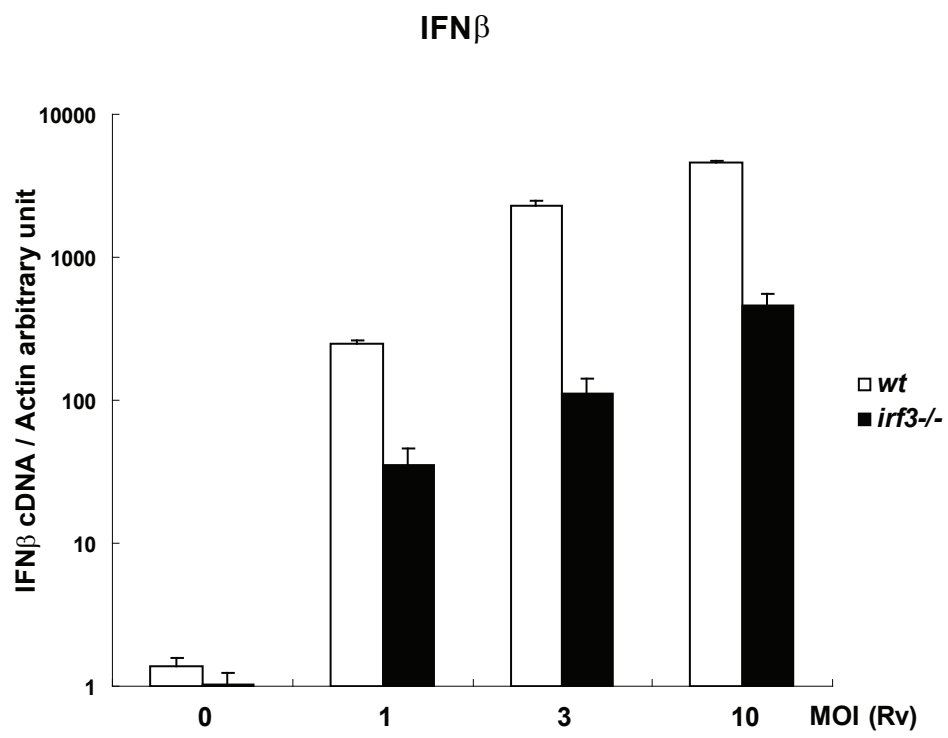

Supplement: ppat.1000500.s002.pdf [file ppat.1000500.s002.pdf]
